# Supplementary material
Source: PubMed Central journal article supplement (PMC5577383)
Supplement: NIHMS885618-supplement-2.pdf [file NIHMS885618-supplement-2.pdf]

Supplementary Table 1 - Characteristics of coronary artery disease cases and controls in UK Biobank

|                                             | Cases          | Controls       |
|---------------------------------------------|----------------|----------------|
| N Individuals                               | 4831           | 115,455        |
| Age $\pm$ SD, years                         | 62.1 $\pm$ 5.9 | 56.7 $\pm$ 7.9 |
| Male, n (%)                                 | 3908 (80%)     | 53,028 (45.9%) |
| Lipid Lowering Therapy, n (%)               | 3998 (82.8%)   | 18,482 (16.0%) |
| Ever Smoker, n (%)                          | 2528 (52.3%)   | 52,629 (45.6%) |
| Hypertension, n (%)                         | 3373 (69.8%)   | 22,809 (19.6%) |
| Diabetes Mellitus, n (%)                    | 880 (18.2%)    | 5524 (4.8%)    |
| Body Mass Index $\pm$ SD, kg/m <sup>2</sup> | 29.3 $\pm$ 4.8 | 27.5 $\pm$ 4.8 |

Supplementary Table 2 - Findings from Stage 1 UK Biobank CAD GWAS

| UK Biobank Stage 1 Analysis - Genome Wide Significant Loci |     |                              |             |    |      |      |           |                         |  |
|------------------------------------------------------------|-----|------------------------------|-------------|----|------|------|-----------|-------------------------|--|
| SNP                                                        | Chr | Gene                         | Description | EA | EAF  | OR   | 95%CI     | P                       |  |
| rs646776                                                   | 1   | (1p13/ <i>SORT1</i> )        | downstream  | T  | 0.78 | 1.17 | 1.11-1.23 | 1.3 x 10 <sup>-8</sup>  |  |
| rs9349379                                                  | 6   | <i>PHACTR1</i>               | intronic    | G  | 0.41 | 1.15 | 1.11-1.20 | 3.4 x 10 <sup>-11</sup> |  |
| rs140570886                                                | 6   | <i>LPA</i>                   | intronic    | C  | 0.02 | 1.92 | 1.68-2.20 | 2.2 x 10 <sup>-21</sup> |  |
| rs4977575                                                  | 9   | (9p21/ <i>CDKN2B-AS1</i> )   | intergenic  | G  | 0.49 | 1.24 | 1.19-1.29 | 5.4 x 10 <sup>-23</sup> |  |
| rs28451064                                                 | 21  | ( <i>KCNE2</i> ) Gene Desert | intergenic  | A  | 0.13 | 1.18 | 1.11-1.25 | 2.1 x 10 <sup>-8</sup>  |  |

\* Genes for SNPs that are outside the transcript boundary of the protein-coding gene are shown in parentheses [eg, (*KCNE2*)].  
 Chr = Chromosome, EA = Effect Allele, EAF = Effect Allele Frequency, OR = Odds Ratio, CI = Confidence Interval

Supplementary Table 7 - Definitions of diseases/traits for PheWAS in 112,338 individuals of European ancestry from UK Biobank

| Phenotype                   | Definition                                                                                                                                                           | Sample Size | Covariates                                                                          |
|-----------------------------|----------------------------------------------------------------------------------------------------------------------------------------------------------------------|-------------|-------------------------------------------------------------------------------------|
| Waist Hip Ratio Adj BMI     | Waist-to-hip ratio measurement at enrollment was quantile-normalized separately in males and females, and then combined                                              | 112,159     | Age, Body Mass Index, Sex, Principal Components, Genotyping Chip                    |
| Body Fat Percentage         | Body fat percentage as measured by an impedance device for body composition at enrollment was quantile-normalized separately in males and females, and then combined | 110,365     | Age, Body Mass Index, Sex, Principal Components, Genotyping Chip                    |
| Systolic BP                 | Automated systolic BP measurement at enrollment                                                                                                                      | 104,611     | Age, Age <sup>2</sup> , Body Mass Index, Sex, Principal Components, Genotyping Chip |
| Diastolic BP                | Automated diastolic BP measurement at enrollment                                                                                                                     | 104,610     | Age, Age <sup>2</sup> , Body Mass Index, Sex, Principal Components, Genotyping Chip |
| Peripheral Vascular Disease | History of peripheral vascular disease or intermittent claudication during verbal interview or hospitalization for ICD code I731, I738, I739, I743, I744, I745       | 692         | Age, Sex, Principal Components, Genotyping Chip                                     |
| Gout                        | History of gout during verbal interview                                                                                                                              | 1612        | Age, Sex, Principal Components, Genotyping Chip                                     |
| Migraine                    | History of migraine during verbal interview                                                                                                                          | 3161        | Age, Sex, Principal Components, Genotyping Chip                                     |
| COPD                        | History of chronic obstructive airway disease, emphysema/chronic bronchitis or emphysema during verbal interview                                                     | 2363        | Age, Sex, Principal Components, Genotyping Chip                                     |
| Lung Cancer                 | History of lung cancer, small cell lung cancer or non-small cell lung cancer during verbal interview                                                                 | 115         | Age, Sex, Principal Components, Genotyping Chip                                     |
| Breast Cancer               | History of breast cancer during verbal interview                                                                                                                     | 2382        | Age, Sex, Principal Components, Genotyping Chip                                     |
| Colorectal Cancer           | History of large bowel cancer/colorectal cancer, colon cancer/sigmoid cancer or rectal cancer during verbal interview                                                | 616         | Age, Sex, Principal Components, Genotyping Chip                                     |
| Any Cancer                  | History of any cancer during verbal interview                                                                                                                        | 9530        | Age, Sex, Principal Components, Genotyping Chip                                     |

Abbreviations: Adj, adjusted; COPD, chronic obstructive pulmonary disease; ICD, international classification of disease; BP, blood pressure

Supplementary Table 8 - Characteristics of publicly available GWAS included in phenome-wide association study

| Consortium            | Outcome/Trait (Units)                                                                        | Sample Size                                                                                                                                                       | Genotyping                                                                      |
|-----------------------|----------------------------------------------------------------------------------------------|-------------------------------------------------------------------------------------------------------------------------------------------------------------------|---------------------------------------------------------------------------------|
| GLGC <sup>1</sup>     | LDL cholesterol (SD)<br>HDL cholesterol (SD)<br>Total cholesterol (SD)<br>Triglycerides (SD) | Up to 188,587 individuals                                                                                                                                         | 37 studies using metabochip, 23 studies using various arrays                    |
| MAGIC <sup>2</sup>    | Fasting Insulin Adjusted for BMI (SD)                                                        | Up to 96,496 individuals                                                                                                                                          | Various arrays, imputation to 2.5 million SNPs using HapMap reference panel     |
| MAGIC <sup>3</sup>    | Insulin Secretion (SD)                                                                       | Up to 5,318 individuals                                                                                                                                           | Various Arrays imputation to 2.4 million SNPs using HapMap reference panel      |
| GIANT <sup>4</sup>    | Height (SD)                                                                                  | Up to 253,288 individuals                                                                                                                                         | Various arrays, imputation to 2.5 million SNPs using HapMap reference panel     |
| GIANT <sup>5</sup>    | Body Mass Index (OR)                                                                         | Up to 263,407 individuals total, focusing on the upper 5 <sup>th</sup> percentile (cases) and lower 5 <sup>th</sup> percentile (controls) of BMI the distribution | Various arrays, imputation to 2.8 million SNPs                                  |
| CKDGen <sup>6</sup>   | Cystatin C/Creatinine<br>Serum estimated<br>Glomerular Filtration Rate (mL/min/1.73m2)       | Up to 133,413 individuals                                                                                                                                         | Various arrays, imputation to 2.5 million SNPs using HapMap reference panel     |
| IIBDGC <sup>7</sup>   | Inflammatory Bowel Disease (OR)                                                              | Up to 38,155 cases and 48,485 controls of European Ancestry                                                                                                       | Various arrays, imputation to 9 million SNPs using 1000 Genomes reference panel |
| ADIPOGen <sup>8</sup> | Adiponectin (SD)                                                                             | Up to 39,883 individuals of European Ancestry                                                                                                                     | Various arrays, imputation to 2.7 million SNPs using HapMap reference panel     |
| DIAGRAM <sup>9</sup>  | Type 2 Diabetes (OR)                                                                         | Meta-analysis of up to 34,840 cases and 114,981 controls in individuals of primarily European Ancestry                                                            | Various arrays, imputation to 2.5 million SNPs using HapMap reference panel     |

DIAGRAM, DIAbetes Genetics Replication And Meta-analysis; GIANT, Genetic Investigation of ANthropometric Traits; GLGC, Global Lipids Genetics Consortium; MAGIC, Meta-Analyses of Glucose and Insulin-related traits Consortium; CKDGen, Chronic Kidney Disease Genetics Consortium; IIBDGC, International Inflammatory Bowel Disease Genetics Consortium; SNPs, single nucleotide polymorphism; LDL cholesterol, low-density lipoprotein cholesterol; HDL cholesterol, high-density lipoprotein cholesterol; SD, standard deviation; BMI, body mass index; OR, odds ratio

## Supplementary Note

### *Functional characterization of ARHGEF26(Val29Leu) missense variant*

#### Cell culture

Human Aortic Endothelial Cells (HAEC), Human Umbilical Vein Endothelial Cells (HUVEC), and Human Coronary Artery Smooth Muscle Cells (HCASMC) were purchased from Lifeline Cell Technology and maintained in VascuLife EnGS Endothelial Medium and SMC Medium (Lifeline Cell Technology) free of antibiotics at 37°C and 5% CO<sub>2</sub>. HAEC, HUVEC, and HCASMC at passages 2-6 were used for experiments. HL60 cell line was purchased from Sigma-Aldrich. HEK293 and THP-1 cell lines were purchased from ATCC. HEK293 was maintained in high-glucose Dulbecco's Modified Eagle Medium with GlutaMA Supplement and 10% fetal bovine serum (Thermo Fisher Scientific). HL60 and THP-1 cells were maintained in RPMI 1640 Medium supplemented with 10% non-heated-inactivated fetal bovine serum (Thermo Fisher Scientific). HL60 cells were differentiated for 5 days in medium containing 1.3% DMSO for leukocyte TEM assays. Cell line specificity was confirmed with tissue-specific markers: HAEC were von Willebrand Factor positive and smooth muscle  $\alpha$ -actin negative, HCASMC were von Willebrand Factor negative and smooth muscle  $\alpha$ -actin positive. Both cell types were confirmed to be mycoplasma negative.

#### siRNA and *ARHGEF26* constructs

Silencer Select siRNA against 3'UTR of human *ARHGEF26* was customized from Thermo Fisher Scientific. Targeting efficiency of siRNA was confirmed by western blot of transfected cells. Non-targeting siRNA control was purchased from Thermo Fisher Scientific. The cDNA containing the complete open-reading frame of human *ARHGEF26* (NM\_015595.3) was obtained from the Mammalian Gene Collection (MGC) and cloned with an N-terminal FLAG-GGGS sequence onto a pcDNA3.4 mammalian expression vector (Thermo Fisher Scientific) using NEBuilder HiFi DNA Assembly Master Mix (NEB). Wild-type ARHGEF26 and 29Leu mutant

was generated by site-directed mutagenesis (Q5 kit, NEB) and sanger-sequenced. Vector without FLAG-GGGS-ARHGEF26 insert is used as control vector.

#### Transfection

HAEC and HCASMC were transfected in 6-well format using Lipofectamine 2000 Transfection Reagent (Invitrogen) following manufacture's protocol. Briefly, cells were plated at 90% confluency the day prior to transfection. Then cells were washed and replenished with Opti-MEM I Reduced Serum Medium. Per well, cells were co-transfected with 50nM siRNA with 1ug/mL *ARHGEF26* vector (final concentration). Medium was replaced at 4 hours post-transfection. Cells were trypsinized and re-plated one-day after transfection (HAEC), or re-plated and starved in serum-free medium (HCASMC).

#### Leukocyte TEM assay

Leukocyte TEM assay was modified from previously described<sup>10</sup>. HAEC was plated on a HTS Transwell 96-well permeable insert with 5.0 µm pore size (Corning) in 40 µL/well medium and allowed to settle for 8 hours. Then the transwell was replaced with complete medium contain 10 ng/mL TNF-α (PeproTech) and cultured overnight. The next day, 235 µL/well serum-free endothelial cell medium containing 0.25% BSA with vehicle or 50ng/mL SDF-1 (PeproTech) was placed on a 96-well white receiver plate. The medium in the transwell insert was removed and replaced with 75 µL/well serum-free endothelial cell medium containing 0.25% BSA and 200,000 differentiated HL60 cells. The insert was then gently placed in the receiver plate and incubated at 37°C for 5 hours with lid on. The insert was removed and HL60 migrated into the receiver plate was quantified with a luminescent assay (CellTiter-Glo, Promega). Standard curve of HL60 cells was prepared by serial dilutions on an identical white receiver plate, with total HL60 cell input set as 100%. Differences in means of percentage of migrated cells per well were assessed by two-way ANOVA with uncorrected Fisher's LSD test within vehicle and SDF-1 subgroups, respectively, and significance threshold set as  $P < 0.05$ .

### Leukocyte adhesion assay

HAEC were transfected and re-plated on a black-wall, clear-bottom 96-well plate and cultured until 100% confluence (48-72-hour post-transfection). Prior to the assay, HAEC were treated with 10 ng/mL TNF- $\alpha$  overnight. THP-1 cells were labeled with Calcein-AM cell-permeant dye (Thermo Fisher Scientific), washed, and added to wells containing HAEC at 200,000 /well in serum-free medium containing 0.25% BSA, and incubated at 37°C for 1 hour. The wells were washed four times in 37°C PBS. After the final wash, the plate was drained thoroughly and 100  $\mu$ L TBS buffer containing 1% NP-40 was added to each well. The plate was agitated for 10 min protected from light, and the fluorescence was measured on a plate reader. Standard curve was generated on an identical, separate plate. Differences in means of fluorescent intensity were assessed by one-way ANOVA with Dunnett's multiple comparisons test, and a multiplicity adjusted P value set as 0.05 for statistical significance.

### VSMC proliferation

HCASMC were transfected and re-plated on a 96-well plate in serum-free medium and starved. After 48 hours, the plate was replaced with medium containing serum and cells are allowed to proliferate for 72 hours. To measure cell proliferation, the medium was removed and cell numbers in each well were counted with a luminescent assay (CellTiter-Glo, Promega). Differences in means of luminescence were assessed by one-way ANOVA with Dunnett's multiple comparisons test, and a multiplicity adjusted P value set as 0.05 for statistical significance.

### Western blot

Cells were harvested with lysis buffer (150mM NaCl, 50mM Tris HCl, 0.5 % NP-40 and 0.1% sodium deoxycholate, pH 7.5) supplemented with fresh protease inhibitors (Pierce Protease Inhibitor Mini Tablet, EDTA free). Cell lysate was incubated for 15min in rotation and centrifuged at 20,000 g for 15min at 4°C to remove insoluble materials. The protein concentration in the supernatant was measured by a bicinchoninic acid (BCA) assay kit (Thermo Fisher

Scientific) and normalized with Laemmli sample buffer. Equal amount of protein was separated by sodium dodecyl sulfate polyacrylamide gel electrophoresis (SDS-PAGE) on 4-20% Mini-PROTEAN TGX precast gels (Bio-Rad Laboratories), transferred to nitrocellulose membrane, and blocked with 5% non-fat milk in Tris-buffered saline supplemented with 0.05% Tween-20 (TBST) at room temperature for 1 hour. The membrane was then probed with primary antibodies to ARHGEF26 (Sigma-Aldrich), FLAG (M2 HRP-conjugated, Sigma-Aldrich), or actin (HRP-conjugated, Santa Cruz Biotechnology), respectively, in 1% non-fat milk in TBST. The HRP-conjugated anti-rabbit secondary antibody was then incubated at room temperature for 1 hour for ARHGEF26 blots. After extensive washing, the membranes were imaged by an enhanced chemiluminescence substrate (EMD Millipore) and imaged on Amersham Imager 600 (GE Healthcare).

#### Cycloheximide chase assay

FLAG-tagged WT or 29Leu FLAG-ARHGEF26 was overexpressed in HEK293 cells for 48 hours. One day prior to the cycloheximide chase, WT and 29Leu ARHGEF26-transfected cells (12 wells each) were plated on the same 24-well plate at 150,000 cells per well in 500 $\mu$ L medium. For the cycloheximide chase, 500 $\mu$ L medium containing 100  $\mu$ g/mL or 200  $\mu$ g/mL cycloheximide (Enzo Life Sciences) was added to each well to achieve 50  $\mu$ g/mL or 100  $\mu$ g/mL final concentration. Cells were harvested in lysis buffer at indicated time points post chase, and BCA-normalized lysate (20  $\mu$ g/time points) were probed for FLAG by Western blot. For each cycloheximide dose, 2 blot sections (WT and 29Leu) from the same treated plate were blotted on same membrane and simultaneously imaged.



## References

1. Global Lipids Genetics Consortium *et al.* Discovery and refinement of loci associated with lipid levels. *Nat Genet* **45**, 1274-83 (2013).
2. Manning, A.K. *et al.* A genome-wide approach accounting for body mass index identifies genetic variants influencing fasting glycemic traits and insulin resistance. *Nat Genet* **44**, 659-69 (2012).
3. Prokopenko, I. *et al.* A central role for GRB10 in regulation of islet function in man. *PLoS Genet* **10**, e1004235 (2014).
4. Wood, A.R. *et al.* Defining the role of common variation in the genomic and biological architecture of adult human height. *Nat Genet* **46**, 1173-86 (2014).
5. Berndt, S.I. *et al.* Genome-wide meta-analysis identifies 11 new loci for anthropometric traits and provides insights into genetic architecture. *Nat Genet* **45**, 501-12 (2013).
6. Pattaro, C. *et al.* Genetic associations at 53 loci highlight cell types and biological pathways relevant for kidney function. *Nat Commun* **7**, 10023 (2016).
7. Liu, J.Z. *et al.* Association analyses identify 38 susceptibility loci for inflammatory bowel disease and highlight shared genetic risk across populations. *Nat Genet* **47**, 979-86 (2015).
8. Dastani, Z. *et al.* Novel loci for adiponectin levels and their influence on type 2 diabetes and metabolic traits: a multi-ethnic meta-analysis of 45,891 individuals. *PLoS Genet* **8**, e1002607 (2012).
9. Morris, A.P. *et al.* Large-scale association analysis provides insights into the genetic architecture and pathophysiology of type 2 diabetes. *Nat Genet* **44**, 981-90 (2012).
10. van Buul, J.D. *et al.* RhoG regulates endothelial apical cup assembly downstream from ICAM1 engagement and is involved in leukocyte trans-endothelial migration. *J Cell Biol* **178**, 1279-93 (2007).
